# Supplementary material for: Cellulose nanocrystallites as an efficient support for nanoparticles of palladium: application for catalytichydrogenation and Heck coupling under mild conditions
Source: Royal Society of Chemistry journal article supplement (doi:10.1039/c0gc00326c), 2010-12-22
Supplement: c0gc00326c.pdf [file c0gc00326c.pdf]

## Electronic Supplementary Information

### GC-MS analysis

All the GC analyses were carried out using an Agilent 7890A series chromatograph equipped with a MS detector (5975C) on a Agilent HP-5 column. For the catalytic hydrogenation reaction, aliquots of 0.5 mL were withdrawn at different times of reaction and extracted in chloroform. To a known volume (400  $\mu\text{L}$ ) of organic phase, an external standard solution was added (50  $\mu\text{L}$  of a 0.022 M 4-methylcyclohexanol solution) and the samples were analyzed by gas chromatography (GC). For the Heck coupling, aliquots of 50  $\mu\text{L}$  were withdrawn and diluted with 450  $\mu\text{L}$  of an external standard solution (0.003 M phenol) and 1000  $\mu\text{L}$   $\text{CH}_3\text{CN}$ .

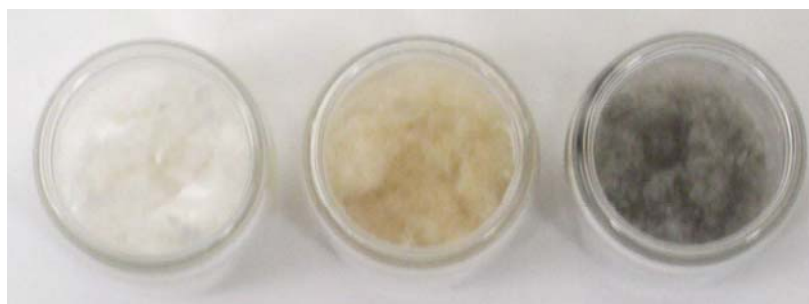

Figure S1. Digital camera images of CNCs freeze-dried powder before impregnation (left), after impregnation, before reduction (middle) and after impregnation and reduction (right)

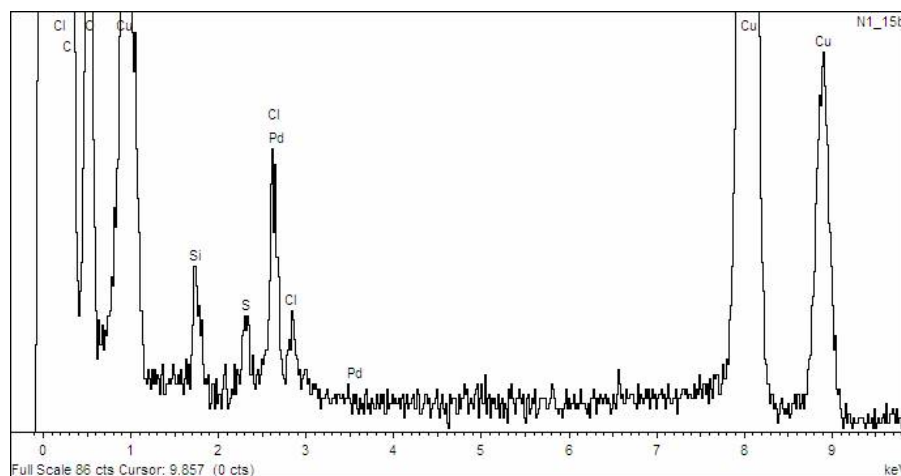

Figure S2. EDX analysis of Pd@CNCs nano-composite

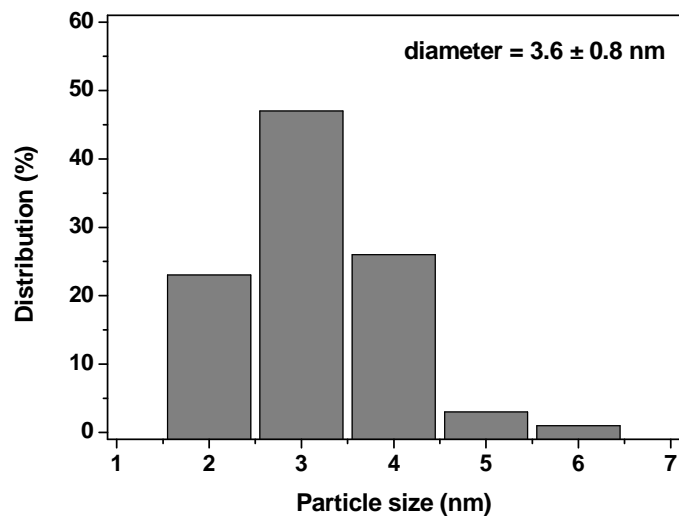

Figure S3. Nanometer-scale size distribution for Pd nanoparticles deposited onto CNCs as obtained from TEM picture of Figure 4

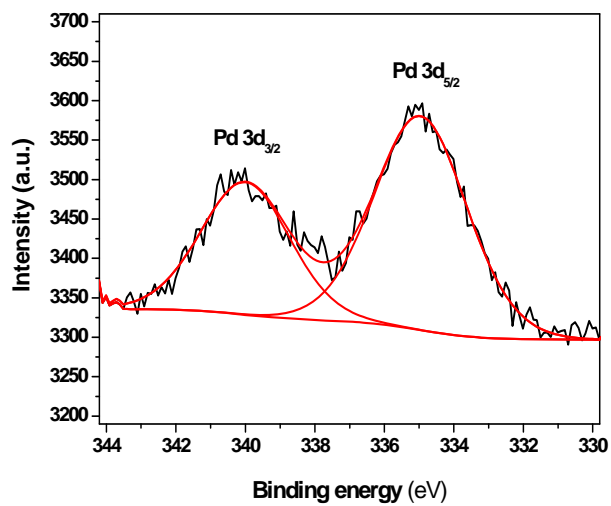

Figure S4. XPS spectrum of Pd3d in PdNPs@CNCs

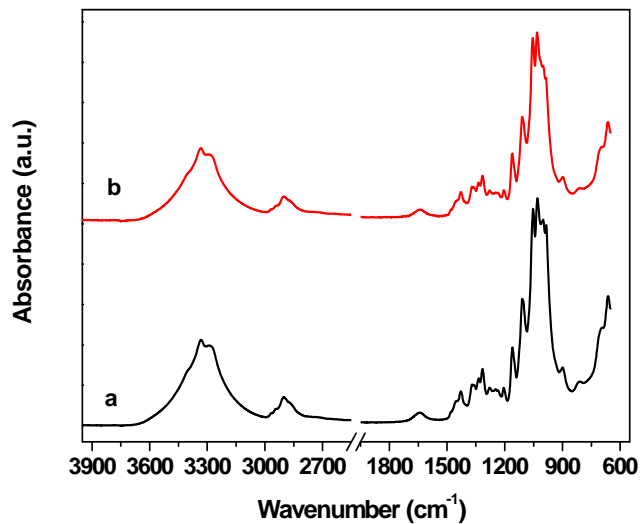

Figure S5. FTIR spectra obtained from CNCs before (a) and after deposition of PdNPs

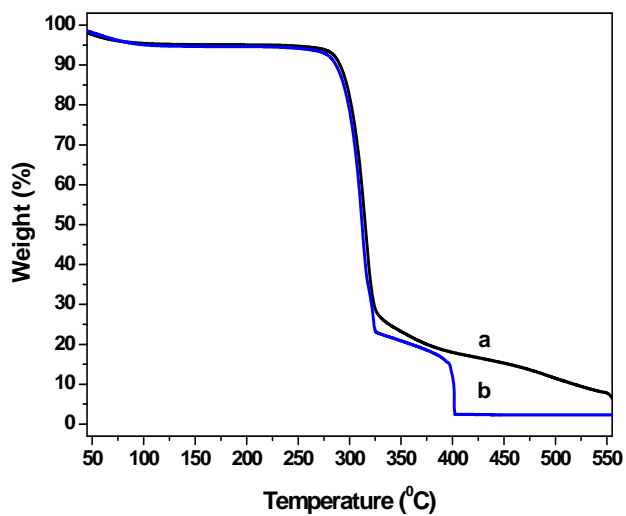

Figure S6. TGA spectra of CNCs under N<sub>2</sub> (a) and air (b) atmosphere
